# Supplementary material
Source: Research Square preprint supplement (doi:10.21203/rs.3.rs-8701553/v1)
Supplement: Supplementary file 1 [file 807b00a877fe861f38725738.docx]

# SUPPLEMENTARY MATERIAL

## **Results**

### Comparative model evaluation

Alternative model specifications were examined to ensure robust estimation of intervention effects. These included: (a) a basic model regressing the outcome on group assignment only (model 1), (b) a model including group and covariates (age, gender, self-compassion; model 2), (c) an autoregressive model additionally controlling for the baseline (pre-test) value of the outcome (model 3). Finally, a confirmatory model (Model 4) was also tested, which constrained the baseline outcome to be independent of group assignment, consistent with randomization assumptions. In cases where baseline differences between groups were detected (e.g., self-salience, HR), an additional alternative model (Model 4 rev) was specified, allowing the baseline value to be regressed on group assignment to test for potential violations of the randomization assumption. Model fit was evaluated using Akaike Information Criterion (AIC), Bayesian Information Criterion (BIC), and R². Comparative fit indices for all models and outcomes are presented in **Table S1**. Model 3 consistently demonstrated the best fit across outcomes and was therefore retained for hypothesis testing.

**Table S1**

*Model fit indices and explained variance (R²) for alternative model specifications across outcomes.*

| Outcome | Model | AIC | BIC | R² |
| --- | --- | --- | --- | --- |
| Compassion |  |  |  |  |
|  | Model 1 | 533.122 | 540.687 | .022 |
|  | Model 2 | 537.144 | 552.209 | .043 |
|  | Model 3 | 526.725 | 544.301 | .165 |
|  | Model 4 | 1034.934 | 1057.532 | .158 |
| Criticism |  |  |  |  |
|  | Model 1 | 457.625 | 465.191 | .001 |
|  | Model 2 | 461.235 | 476.300 | .027 |
|  | Model 3 | 430.961 | 448.537 | .317 |
|  | Model 4 | 939.409 | 962.007 | .353 |
|  | Model 4 rev | 937.365 | 962.473 | .339 |
| Universal connection |  |  |  |  |
|  | Model 1 | 455.895 | 463.461 | .032 |
|  | Model 2 | 458.940 | 474.005 | .063 |
|  | Model 3 | 452.222 | 469.798 | .149 |
|  | Model 4 | 882.722 | 905.320 | .162 |
| Interpersonal connection |  |  |  |  |
|  | Model 1 | 347.475 | 355.041 | .048 |
|  | Model 2 | 352.032 | 367.097 | .063 |
|  | Model 3 | 328.755 | 346.331 | .29 |
|  | Model 4 | 644.039 | 666.637 | .31 |
| Self Salience |  |  |  |  |
|  | Model 1 | 461.601 | 469.166 | .002 |
|  | Model 2 | 463.578 | 478.643 | .062 |
|  | Model 3 | 462.787 | 480.363 | .09 |
|  | Model 4 | 843.395 | 865.993 | .097 |
| Positive Affect (High) |  |  |  |  |
|  | Model 1 | 522.128 | 529.694 | .023 |
|  | Model 2 | 512.861 | 527.927 | .174 |
|  | Model 3 | 480.459 | 498.459 | .431 |
|  | Model 4 | 992.134 | 1014.732 | .382 |
| Positive Affect (Low) |  |  |  |  |
|  | Model 1 | 432.728 | 449.293 | .05 |
|  | Model 2 | 435.361 | 450.426 | .085 |
|  | Model 3 | 426.379 | 443.955 | .189 |
|  | Model 4 | 980.981 | 1003.579 | .174 |
| Negative Affect (High) |  |  |  |  |
|  | Model 1 | 512.438 | 520.003 | .022 |
|  | Model 2 | 517.174 | 532.239 | .036 |
|  | Model 3 | 504.178 | 521.754 | .182 |
|  | Model 4 | 1036.007 | 1058.605 | .178 |
| Negative Affect (Low) |  |  |  |  |
|  | Model 1 | 531.622 | 539.187 | .004 |
|  | Model 2 | 532.634 | 547.699 | .057 |
|  | Model 3 | 501.704 | 519.280 | .343 |
|  | Model 4 | 1041.789 | 1064.387 | .339 |
| HRV |  |  |  |  |
|  | Model 1 | 695.364 | 702.929 | .004 |
|  | Model 2 | 697.957 | 713.023 | .046 |
|  | Model 3 | 600.377 | 617.476 | .705 |
|  | Model 4 | 1303.542 | 1326.140 | .701 |
| HR |  |  |  |  |
|  | Model 1 | 631.133 | 638.699 | .049 |
|  | Model 2 | 630.557 | 645.622 | .117 |
|  | Model 3 | 461.630 | 478.729 | .885 |
|  | Model 4 | 1118.968 | 1141.566 | .890 |
|  | Model 4 rev | 1116.207 | 1141.315 | .890 |

*Legend.* AIC = Akaike Information Criterion; BIC = Bayesian Information Criterion ; HRV = Heart Rate Variability; HR = Heart Rate; PS = Physiological Synchrony; NADA = Nondual Awareness Dimensional Assessment*.*

**Table S2**

*Within-group pre-post psychological differences (Wilcoxon signed-rank test)*

| **Outcome** | **Group** | **Median**  **Pre** | **Median**  **Post** | ***Z*** | ***p*** | ***r*** |
| --- | --- | --- | --- | --- | --- | --- |
| **Compassion** | Control  N=45 | 17.0 | 22.0 | 4.61 | < .001*** | .69 |
|  | VR  N=46 | 18.0 | 22.5 | 4.79 | < .001*** | .71 |
| **Criticism** | Control  N=45 | 9.0 | 6.0 | −3.82 | < .001*** | -.57 |
|  | VR  N=46 | 11.0 | 7.0 | −5.29 | < .001*** | -.78 |
| **Universal connection** | Control  N=45 | 3.0 | 5.0 | 2.45 | < .001*** | .37 |
|  | VR  N=46 | 2.0 | 6.0 | 4.21 | < .001*** | .62 |
| **Interpersonal connection** | Control  N=45 | 2.0 | 3.0 | 3.72 | < .001*** | .55 |
|  | VR  N=46 | 2.0 | 4.0 | 5.22 | < .001*** | .77 |
| **Self-Salience** | Control  N=45 | 2.0 | 6.0 | 4.03 | < .001*** | .60 |
|  | VR  N=46 | 1.0 | 6.0 | 4.70 | < .001*** | .69 |
| **Positive Affect High** | Control  N=45 | 12.0 | 14.0 | 3.25 | .001*** | .48 |
|  | VR  N=46 | 13.0 | 15.5 | 3.27 | .001*** | .48 |
| **Positive Affect Low** | Control  N=45 | 14.0 | 20.0 | 5.49 | < .001*** | .82 |
|  | VR  N=46 | 16.0 | 21.0 | 5.37 | < .001*** | .79 |
| **Negative Affect High** | Control  N=45 | 7.0 | 2.0 | -4.23 | < .001*** | -.63 |
|  | VR  N=46 | 6.0 | 1.0 | -4.88 | < .001*** | -.72 |
| **Negative Affect Low** | Control  N=45 | 6.0 | 4.0 | -2.15 | .012** | -.37 |
|  | VR  N=46 | 5.0 | 4.0 | -.40 | .690 | -.06 |

*Legend*. *Z* = standardized Wilcoxon signed-rank statistic. *r* = effect size; *p* = p-value. **p* < .05,

***p* < .01, ****p* < .001..

**Table S3**

*Within-group pre–post physiological differences (Wilcoxon signed-rank test)*

| Outcome | Group | Median  Pre | Median  Post | *Z* | *p* | *r* |
| --- | --- | --- | --- | --- | --- | --- |
| **HRV** | Control  N=40 | 45.45 | 48.6 | .97 | .330 | .15 |
|  | VR  N=44 | 49.88 | 51.96 | 2.10 | .036* | .32 |
| **HR** | Control  N=40 | 80.67 | 78.370 | -3.89 | < .001*** | -.62 |
|  | VR  N=44 | 73.04 | 70.30 | -3.59 | < .001*** | -.54 |

*Legend. Z* = standardized Wilcoxon signed-rank statistic, r = effect size, *p* = p-value. **p* < .05, ***p* < .01,

****p* < .001.

**Table S4**

*Regression models examining the relationship between physiological synchrony (during the experience) and post-intervention psychological outcomes.*

| Outcome | Predictor | *B* | *SE (B)* | *t* | *p* |
| --- | --- | --- | --- | --- | --- |
| Compassion |  |  |  |  |  |
|  | PS (cardiac) | 18.15 | 14.98 | 1.211 | .229 |
|  | T1 Compassion | .408 | .121 | 3.356 | .001 |
|  | R² |  |  |  | .099 |
|  | PS (respiratory) | 29.61 | 16.38 | 1.807 | .07 |
|  | T1 Compassion | .48 | .13 | 3.802 | <.001*** |
|  | R² |  |  |  | .139 |
| Criticism |  |  |  |  |  |
|  | PS (cardiac) | 3.38 | 9.44 | .36 | .72 |
|  | T1 Criticism | .39 | .08 | 5.079 | <.001*** |
|  | R² |  |  |  | .252 |
|  | PS (respiratory) | 2.14 | 10.40 | .302 | .764 |
|  | T1 Criticism | .38 | .08 | 4.981 | <.001*** |
|  | R² |  |  |  | .239 |
| Universal connection |  |  |  |  |  |
|  | PS (cardiac) | 16.06 | 9.69 | 1.657 | .101 |
|  | T1 Connection | .3244 | .1164 | 2.787 | .007* |
|  | R² |  |  |  | .090 |
|  | PS (respiratory) | 13.90 | 10.86 | 1.28 | .20 |
|  | T1 Connection | .283 | .121 | 2.34 | .022* |
|  | R² |  |  |  | .053 |
| Interpersonal connection |  |  |  |  |  |
|  | PS (cardiac) | 8.36 | 5.12 | 1.63 | .106 |
|  | T1 Connection | .54 | .12 | 4.65 | <.001*** |
|  | R² |  |  |  | .193 |
|  | PS (respiratory) | 12.81 | 5.48 | 2.337 | .022* |
|  | T1 Connection | .53 | .122 | 4.377 | <.001*** |
|  | R² |  |  |  | .201 |
| Self Salience |  |  |  |  |  |
|  | PS (cardiac) | 21.86 | 10.20 | 2.14 | .035* |
|  | T1 Self salience | .19 | .16 | 1.20 | .232 |
|  | R² |  |  |  | .053 |
|  | PS (respiratory) | 12.76 | 11.44 | 1.11 | .268 |
|  | T1 Self salience | .18 | .16 | 1.11 | .269 |
|  | R² |  |  |  | .008 |
| Positive Affect (High) |  |  |  |  |  |
|  | PS (cardiac) | 11.46 | 11.63 | 0.99 | .327 |
|  | T1 Positive affect | .61 | .09 | 6.82 | <.001*** |
|  | R² |  |  |  | .343 |
|  | PS (respiratory) | 7.36 | 12.91 | .57 | .57 |
|  | T1 Positive affect | .64 | .10 | 6.73 | <.001*** |
|  | R² |  |  |  | .343 |
| Positive Affect (Low) |  |  |  |  |  |
|  | PS (cardiac) | 15.00 | 8.17 | 1.84 | .07 |
|  | T1 Positive affect | .21 | .05 | 4.22 | <.001*** |
|  | R² |  |  |  | .185 |
|  | PS (respiratory) | 9.27 | 9.31 | 0.99 | .32 |
|  | T1 Positive affect | .21 | .05 | 3.93 | <.001*** |
|  | R² |  |  |  | .144 |
| Negative Affect (High) |  |  |  |  |  |
|  | PS (cardiac) | -7.64 | 13.08 | -.58 | .56 |
|  | T1 Negative affect | .36 | .09 | 4.04 | <.001*** |
|  | R² |  |  |  | .150 |
|  | PS (respiratory) | -6.63 | 14.29 | -.464 | .64 |
|  | T1 Negative affect | .34 | .09 | 3.661 | <.001*** |
|  | R² |  |  |  | .124 |
| Negative Affect (Low) |  |  |  |  |  |
|  | PS (cardiac) | -6.54 | 13.17 | -.50 | .621 |
|  | T1 Negative affect | .52 | .09 | 5.80 | <.001*** |
|  | R² |  |  |  | .279 |
|  | PS (respiratory) | -14.95 | 14.13 | -1.058 | .293 |
|  | T1 Negative affect | .56 | .09 | 6.62 | <.001*** |
|  | R² |  |  |  | .339 |

*Legend.* PS = Physiological Synchrony; NADA = Nondual Awareness Dimensional Assessment, T1 = pre-intervention measure; T2 = post-intervention measure. **p* < .05, ***p* < .01, ****p* < .001.

**Table S5**

*Frequency of adverse effects.*

| **Group** | **Never (%)** | **Rarely (%)** | **Occasionally(%)** | **Regularly (%)** | **Frequently (%)** | **Total** |
| --- | --- | --- | --- | --- | --- | --- |
| **Control** | 33 (75%) | 3 (6.8%) | 4 (9.1%) | 4 (9.1%) | 0 | 44 |
| **VR** | 31 (67%) | 8 (17.4%) | 5 (10.9%) | 2 (4.3%) | 0 | 46 |

**Table S6**

*Reported interference in normal functioning (among participants who reported experiencing adverse effect).*

| **Group** | **Never** | **Rarely** | **Occasionally** | **Regularly** | **Frequently** | **Total** |
| --- | --- | --- | --- | --- | --- | --- |
| **Control** | 2 (18%) | 7 (64%) | 1 (9%) | 0 | 1 (9%) | 11 |
| **VR** | 8 (54%) | 6 (40%) | 1(6%) | 0 | 0 | 15 |

**Table S7**

*Duration of Adverse Effects (among participants who reported experiencing adverse effects and interference).*

| **Group** | **1 Day or Less** | **Few Days** | **All Week** | **Total** |
| --- | --- | --- | --- | --- |
| **Control** | 8 (90%) | 0 | 1 (10%) | 9 |
| **VR** | 4 (60%) | 3 (40%) | 0 | 7 |

**Table S8**

*Types of adverse effects reported by group.*

| **Response** | **VR (n = 46)** | **Control (n=44)** |
| --- | --- | --- |
| **Concentration issues** | 1 (5%) | 1 (5%) |
| **Anxiety** | 3 (7%) | 4 (9%) |
| **Disturbing memories from the past** | 1 (2%) | 1 (2%) |
| **Discomfort** | 4 (9%) | 2 (5%) |
| **Anhedonia** | 0 | 0 |
| **Disconnection from people** | 3 (7%) | 2(5%) |
| **Sleep issues** | 1 (2%) | 2(5%) |
| **Aches and pains** | 2 (4%) | 4 (9%) |
| **Sensory sensitivity** | 1 (2%) | 1 (2%) |
| **Disconnection from environment** | 2 (5%) | 2 (5%) |
| **Other symptoms** | 2 (5%) | 0 |
| **None of the previous symptoms** | 36 (78%) | 35(80%) |

*Legend.* Participants could select more than one response. Values represent frequency (percentage) within each group.

## **Methods**

**Figure S1**

*Adapted pictographic item assessing perceived interpersonal connection, based on Aron et al. (1992).*

***
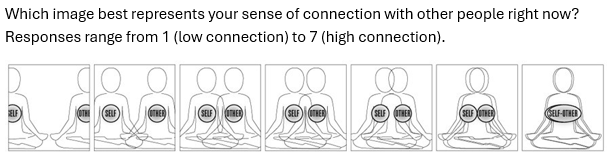
***

## **Statistical analysis**

**Table S9**

*Shapiro-Wilk Test results for normality of continuous variables.*

| **Variable** | ***W*** | ***p*** |
| --- | --- | --- |
| Compassion_pre | .988 | .5789 |
| Compassion_post | .935 | .0002*** |
| Connection (NADA)_pre | .837 | < .0001*** |
| Connection (NADA)_post | .919 | < .0001*** |
| Connection (pictographic)_pre | .838 | < .0001*** |
| Connection (pictographic)_post | .945 | .0007*** |
| Positive Affect (high arousal)_pre | .979 | .1603 |
| Positive Affect (high arousal)_post | .972 | .0462* |
| Positive Affect (low arousal)_pre | .979 | .1613 |
| Positive Affect (low arousal)_post | .932 | < .0001*** |
| Criticism_pre | .948 | .0011** |
| Criticism_post | .907 | < .0001*** |
| Self Salience_pre | .708 | < .0001*** |
| Self Salience_post | .901 | < .0001*** |
| Negative Affect (high arousal)_pre | .955 | .0033** |
| Negative Affect (high arousal)_post | .748 | < .0001*** |
| Negative Affect (low arousal)_pre | .936 | .0002*** |
| Negative Affect (low arousal)_post | .925 | < .0001*** |
| HRV_pre | .936 | .0001*** |
| HRV_post | .925 | .0017*** |
| HR_pre | .985 | .2978 |
| HR_post | .983 | .4025 |
| PS (cardiac) | .956 | .0030** |
| PS (respiratory) | .952 | .0077** |
| SOCS-S | .978 | .1247 |
| SOCS-O | .984 | .3095 |
| FCS | .977 | .1029 |

*Legend.* NADA = Non dual awareness Dimensional Assessment ; HRV = Heart Rate Variability; HR = Heart Rate; PS = Physiological Synchrony; SOCS-O = Sussex-Oxford Compassion Scales (compassion to others); SOCS-S = Sussex-Oxford Compassion Scales (self-compassion); FCS = Fear of Compassion Scale. * = *p*<.05;

** = *p*<.01; *** = *p*< .001

**Table S10**

*Spearman correlations between physiological synchrony and psychological pre-intervention outcomes (in both groups).*

| **Variable** | **1** | **2** | **3** | **4** | **5** | **6** | **7** | **8** | **9** | **10** | **11** |
| --- | --- | --- | --- | --- | --- | --- | --- | --- | --- | --- | --- |
| **1. PS (cardiac)** |  |  |  |  |  |  |  |  |  |  |  |
| **2. PS (respiratory)** | 0.58*** |  |  |  |  |  |  |  |  |  |  |
| **3. Compassion T1** | -0.21* | -0.13 |  |  |  |  |  |  |  |  |  |
| **4. Criticism T1** | 0.32** | 0.26* | -0.43*** |  |  |  |  |  |  |  |  |
| **5. Connection (NADA) T1** | -0.05 | -0.05 | 0.21* | -0.16 |  |  |  |  |  |  |  |
| **6. Connction (pictographic) T1** | -0.11 | -0.08 | 0.55*** | -0.22* | 0.18 |  |  |  |  |  |  |
| **7. Self salience T1** | -0.00 | 0.05 | 0.12 | -0.13 | 0.82*** | 0.11 |  |  |  |  |  |
| **8. Positive Affect High T1** | 0.02 | -0.02 | 0.52*** | -0.14 | 0.19 | 0.38*** | 0.13 |  |  |  |  |
| **9. Positive Affect Low T1** | 0.07 | -0.03 | 0.28** | -0.19 | -0.02 | 0.02 | -0.06 | 0.35*** |  |  |  |
| **10. Negative Affect High T1** | -0.11 | -0.03 | -0.03 | 0.33** | 0.11 | 0.16 | 0.15 | 0.05 | -0.70*** |  |  |
| **11. Negative Affect Low T1** | -0.16 | 0.07 | -0.19 | 0.32** | 0.04 | -0.02 | 0.03 | -0.23* | -0.39*** | 0.53*** |  |

*Legend.* PS = Physiological Synchrony; NADA = Nondual Awareness Dimensional Assessment; T1 = pre-intervention measure. Spearman’s correlations are shown below the diagonal. **p* < .05, ***p* < .01, ****p* < .001
